# Supplementary material
Source: MDPI journal article supplement (https://www.mdpi.com/2072-4292/14/10/2458)
Supplement: s1 [file s1]

The Table S1 indicate that seasonal maximum VIs from Sentinel-2 can estimate yield better than mean and median VIs, and interpolated VIs which aim to minimise cloud effect do not necessarily improve yield estimation accuracy compared to the original (i.e. non-interpolated) value.

Table. S1 Accuracy assessment (R<sup>2</sup> and RMSE) of linear regression models between Sentinel-2 VIs calculated based on temporal aggregation methods (seasonal maximum, mean, median from original VIs value and interpolated (fitted) one) and yield. SD represents the standard deviation of performance metrics computed from the 500-fold cross-validation. The VIs is ordered based on RMSE and R<sup>2</sup>.

| VIs                           | RMSE  | nRMSE  | R <sup>2</sup> | RMSE_SD | R <sup>2</sup> _SD |
|-------------------------------|-------|--------|----------------|---------|--------------------|
| Clgreen_max_10m               | 1.477 | 19.91% | 0.516          | 0.370   | 0.225              |
| Clgreen_mean_10m              | 1.628 | 21.94% | 0.425          | 0.371   | 0.230              |
| Clgreen_median_10m            | 1.802 | 24.29% | 0.318          | 0.400   | 0.255              |
| Clgreen_max_fitted_10m        | 1.520 | 20.49% | 0.500          | 0.341   | 0.219              |
| Clgreen_mean_fitted_10m       | 1.561 | 21.03% | 0.477          | 0.381   | 0.230              |
| Clgreen_median_fitted_10m     | 1.656 | 22.32% | 0.419          | 0.338   | 0.226              |
| Clred_max_10m                 | 1.483 | 19.99% | 0.546          | 0.333   | 0.204              |
| Clred_max_fitted_10m          | 1.481 | 19.97% | 0.534          | 0.314   | 0.207              |
| Clred_mean_10m                | 1.525 | 20.56% | 0.508          | 0.331   | 0.213              |
| Clred_mean_fitted_10m         | 1.475 | 19.88% | 0.547          | 0.325   | 0.202              |
| Clred_median_10m              | 1.885 | 25.41% | 0.249          | 0.350   | 0.227              |
| Clred_median_fitted_10m       | 1.626 | 21.92% | 0.424          | 0.344   | 0.237              |
| EVI_max_10m                   | 1.771 | 23.87% | 0.319          | 0.348   | 0.219              |
| EVI_max_fitted_10m            | 1.703 | 22.95% | 0.378          | 0.334   | 0.231              |
| EVI_mean_10m                  | 1.691 | 22.79% | 0.377          | 0.332   | 0.227              |
| EVI_mean_fitted_10m           | 1.667 | 22.46% | 0.396          | 0.338   | 0.226              |
| EVI_median_10m                | 1.779 | 23.98% | 0.312          | 0.351   | 0.242              |
| EVI_median_fitted_10m         | 1.753 | 23.62% | 0.343          | 0.295   | 0.226              |
| MCARI/OSAVI_max_10m           | 2.017 | 27.18% | 0.256          | 0.362   | 0.237              |
| MCARI/OSAVI_max_fitted_10m    | 1.924 | 25.92% | 0.316          | 0.470   | 0.244              |
| MCARI/OSAVI_mean_10m          | 1.692 | 22.80% | 0.363          | 0.365   | 0.233              |
| MCARI/OSAVI_mean_fitted_10m   | 1.730 | 23.32% | 0.351          | 0.407   | 0.243              |
| MCARI/OSAVI_median_10m        | 1.771 | 23.86% | 0.324          | 0.366   | 0.247              |
| MCARI/OSAVI_median_fitted_10m | 1.796 | 24.21% | 0.309          | 0.303   | 0.226              |

Table S1 continued. Accuracy assessment ( $R^2$  and RMSE) of linear regression models between Sentinel-2 VIs and yield.

| VIs                           | RMSE  | nRMSE  | $R^2$ | RMSE_SD | $R^2\_SD$ |
|-------------------------------|-------|--------|-------|---------|-----------|
| MSAVI_max_10m                 | 1.693 | 22.82% | 0.378 | 0.349   | 0.228     |
| MSAVI_max_fitted_10m          | 1.713 | 23.08% | 0.369 | 0.327   | 0.227     |
| MSAVI_mean_10m                | 1.705 | 22.98% | 0.364 | 0.330   | 0.220     |
| MSAVI_mean_fitted_10m         | 1.673 | 22.55% | 0.393 | 0.337   | 0.220     |
| MSAVI_median_10m              | 1.775 | 23.93% | 0.302 | 0.344   | 0.232     |
| MSAVI_median_fitted_10m       | 1.752 | 23.61% | 0.350 | 0.303   | 0.226     |
| MTCI_max_10m                  | 2.017 | 27.18% | 0.378 | 0.530   | 0.276     |
| MTCI_max_fitted_10m           | 1.868 | 25.18% | 0.462 | 0.743   | 0.267     |
| MTCI_mean_10m                 | 1.604 | 21.61% | 0.452 | 0.449   | 0.264     |
| MTCI_mean_fitted_10m          | 1.932 | 26.03% | 0.371 | 0.565   | 0.285     |
| MTCI_median_10m               | 1.663 | 22.41% | 0.436 | 0.434   | 0.261     |
| MTCI_median_fitted_10m        | 1.971 | 26.56% | 0.339 | 0.506   | 0.272     |
| NDVI_max_10m                  | 1.533 | 20.66% | 0.484 | 0.332   | 0.214     |
| NDVI_max_fitted_10m           | 1.727 | 23.27% | 0.328 | 0.331   | 0.229     |
| NDVI_mean_10m                 | 1.652 | 22.26% | 0.414 | 0.322   | 0.218     |
| NDVI_mean_fitted_10m          | 1.581 | 21.31% | 0.464 | 0.321   | 0.207     |
| NDVI_median_10m               | 1.929 | 26.00% | 0.201 | 0.328   | 0.203     |
| NDVI_median_fitted_10m        | 1.792 | 24.15% | 0.299 | 0.324   | 0.234     |
| OSAVI_max_10m                 | 1.618 | 21.81% | 0.433 | 0.338   | 0.224     |
| OSAVI_max_fitted_10m          | 1.721 | 23.20% | 0.352 | 0.329   | 0.222     |
| OSAVI_mean_10m                | 1.678 | 22.62% | 0.395 | 0.326   | 0.218     |
| OSAVI_mean_fitted_10m         | 1.629 | 21.96% | 0.431 | 0.325   | 0.215     |
| OSAVI_median_10m              | 1.848 | 24.90% | 0.250 | 0.342   | 0.223     |
| OSAVI_median_fitted_10m       | 1.772 | 23.88% | 0.328 | 0.304   | 0.226     |
| SAVI_max_10m                  | 1.696 | 22.86% | 0.375 | 0.343   | 0.226     |
| SAVI_max_fitted_10m           | 1.727 | 23.28% | 0.356 | 0.324   | 0.221     |
| SAVI_mean_10m                 | 1.704 | 22.97% | 0.367 | 0.330   | 0.223     |
| SAVI_mean_fitted_10m          | 1.669 | 22.50% | 0.394 | 0.335   | 0.221     |
| SAVI_median_10m               | 1.784 | 24.05% | 0.291 | 0.340   | 0.229     |
| SAVI_median_fitted_10m        | 1.757 | 23.68% | 0.343 | 0.300   | 0.221     |
| TCARI/OSAVI_max_10m           | 1.932 | 26.04% | 0.185 | 0.309   | 0.169     |
| TCARI/OSAVI_max_fitted_10m    | 1.928 | 25.99% | 0.210 | 0.303   | 0.196     |
| TCARI/OSAVI_mean_10m          | 1.894 | 25.52% | 0.244 | 0.362   | 0.218     |
| TCARI/OSAVI_mean_fitted_10m   | 1.953 | 26.32% | 0.211 | 0.371   | 0.202     |
| TCARI/OSAVI_median_10m        | 2.004 | 27.01% | 0.164 | 0.295   | 0.185     |
| TCARI/OSAVI_median_fitted_10m | 1.982 | 26.71% | 0.162 | 0.300   | 0.184     |

Table S1 continued. Accuracy assessment ( $R^2$  and RMSE) of linear regression models between Sentinel-2 VIs calculated based on temporal aggregation methods (seasonal maximum, mean, median from original VIs value and interpolated (fitted) value ) and yield. The VIs is ordered based on RMSE and  $R^2$ .

| VIs                   | RMSE  | nRMSE  | $R^2$ | RMSE_SD | $R^2\_SD$ |
|-----------------------|-------|--------|-------|---------|-----------|
| TVI_max_10m           | 1.790 | 24.12% | 0.301 | 0.345   | 0.215     |
| TVI_max_fitted_10m    | 1.752 | 23.61% | 0.332 | 0.332   | 0.224     |
| TVI_mean_10m          | 1.717 | 23.14% | 0.354 | 0.333   | 0.225     |
| TVI_mean_fitted_10m   | 1.699 | 22.89% | 0.372 | 0.340   | 0.225     |
| TVI_median_10m        | 1.760 | 23.72% | 0.321 | 0.348   | 0.246     |
| TVI_median_fitted_10m | 1.777 | 23.95% | 0.317 | 0.302   | 0.222     |

Table S2 Accuracy assessment ( $R^2$  and RMSE) of linear regression models between PlanetScope VIs calculated based on temporal aggregation methods (seasonal maximum, mean, median from original VIs value) and yield. SD represents the standard deviation of performance metrics computed from the 500-fold cross-validation. The VIs is ordered based on RMSE and  $R^2$ .

| PlanetScope_VIS             | RMSE | nRMSE  | $R^2$ | RMSE_SD | $R^2\_SD$ |
|-----------------------------|------|--------|-------|---------|-----------|
| EVI <sub>max</sub> _3m      | 1.48 | 19.95% | 0.52  | 0.35    | 0.21      |
| EVI <sub>mean</sub> _3m     | 1.63 | 21.97% | 0.42  | 0.41    | 0.25      |
| EVI <sub>median</sub> _3m   | 1.90 | 25.61% | 0.22  | 0.36    | 0.21      |
| MSAVI <sub>max</sub> _3m    | 1.53 | 20.62% | 0.49  | 0.37    | 0.21      |
| MSAVI <sub>mean</sub> _3m   | 1.64 | 22.10% | 0.41  | 0.40    | 0.25      |
| MSAVI <sub>median</sub> _3m | 1.85 | 24.93% | 0.28  | 0.39    | 0.23      |
| NDVI <sub>max</sub> _3m     | 1.57 | 21.16% | 0.48  | 0.35    | 0.21      |
| NDVI <sub>mean</sub> _3m    | 1.50 | 20.22% | 0.51  | 0.39    | 0.23      |
| NDVI <sub>median</sub> _3m  | 1.55 | 20.89% | 0.47  | 0.37    | 0.23      |
| SAVI <sub>max</sub> _3m     | 1.53 | 20.62% | 0.49  | 0.37    | 0.21      |
| SAVI <sub>mean</sub> _3m    | 1.64 | 22.10% | 0.41  | 0.40    | 0.24      |
| SAVI <sub>median</sub> _3m  | 1.83 | 24.66% | 0.29  | 0.39    | 0.23      |

Table S3 Accuracy assessment ( $R^2$  and RMSE) of linear regression models between Sentinel-2 retrieved LAI calculated based on temporal aggregation methods (seasonal maximum, mean, median from original VIs value and interpolated (fitted) one) and yield. SD represents the standard deviation of performance metrics computed from the 500-fold cross-validation. The VIs is ordered based on RMSE and  $R^2$ .

| LAI                    | RMSE | nRMSE  | $R^2$ | RMSE_SD | $R^2\_SD$ |
|------------------------|------|--------|-------|---------|-----------|
| SL2P LAI_max           | 1.56 | 21.02% | 0.49  | 0.34    | 0.21      |
| SL2P LAI_fitted_max    | 1.56 | 21.02% | 0.48  | 0.34    | 0.21      |
| SL2P LAI_mean          | 1.76 | 23.72% | 0.32  | 0.37    | 0.25      |
| SL2P LAI_fitted_mean   | 1.94 | 26.15% | 0.21  | 0.32    | 0.22      |
| SL2P LAI_median        | 1.90 | 25.61% | 0.24  | 0.30    | 0.24      |
| SL2P LAI_fitted_median | 1.94 | 26.15% | 0.17  | 0.30    | 0.17      |

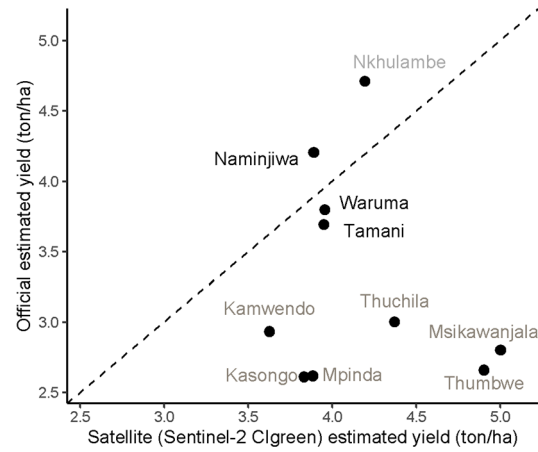

Figure S1 Comparison between official yield and estimated yield based on Sentinel-2 CIgreen. The figure indicates that two estimates agree better for EPAs (Naminjiwa, Waruma, Tamani) where field data were collected for model calibration. Bigger disparities exist for EPAs outside of the calibration region, especially for Miskawanjala EPA, Kamwendo and Thuchila EPAs.

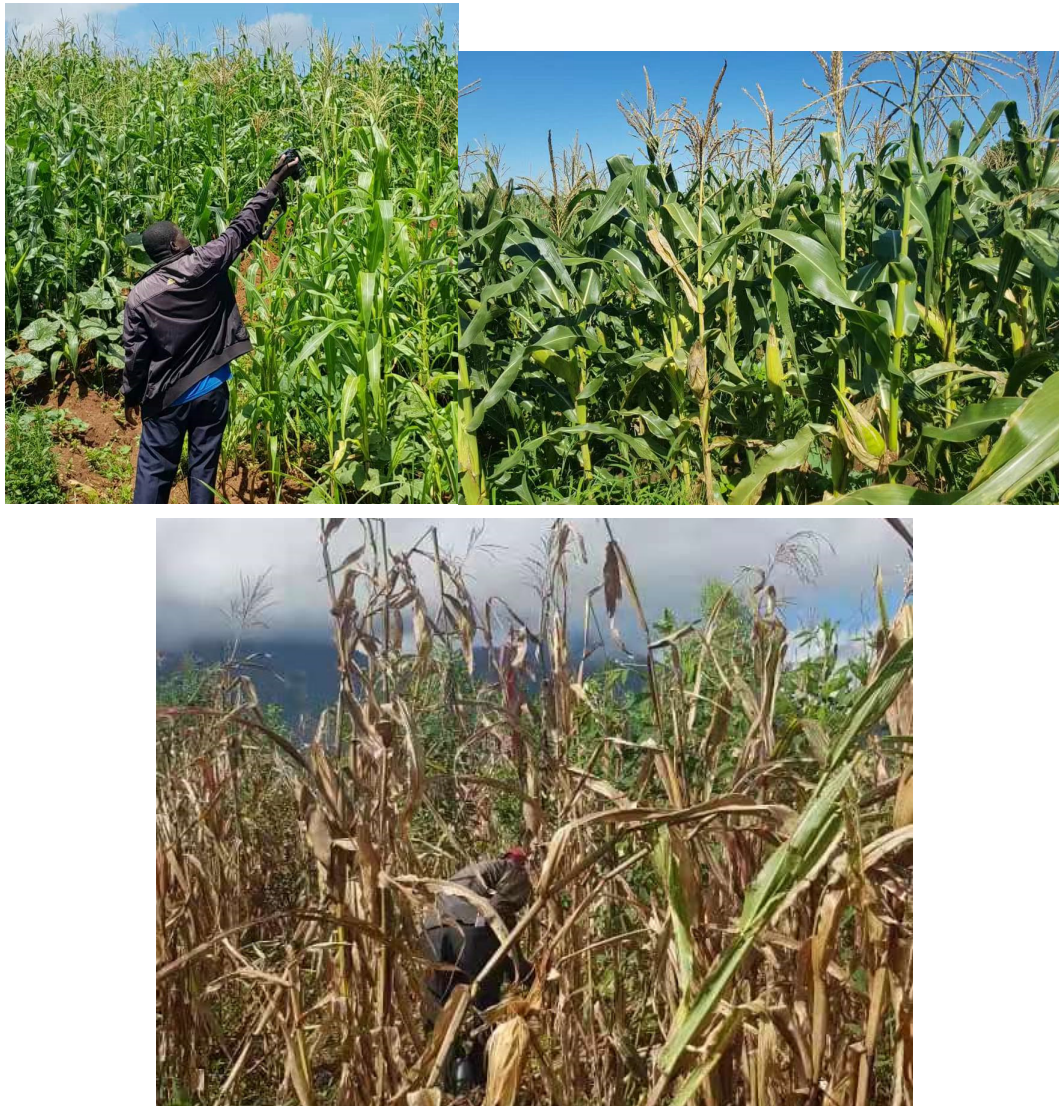

Figure S2 Field photos showing maize-legume intercropped plots at peak growing season (top) and harvesting stage (bottom).
